# Supplementary material for: Understanding the biomimetic properties of gallium in Pseudomonas aeruginosa: an XAS and XPS study
Source: Royal Society of Chemistry journal article supplement (doi:10.1039/c7dt00651a), 2017-01-01
Supplement: c7dt00651a1.pdf [file c7dt00651a1.pdf]

## ELECTRONIC SUPPLEMENTARY INFORMATION (ESI):

### Understanding the biomimetic properties of Gallium in *Pseudomonas aeruginosa*: a XAS and XPS study

F. Porcaro<sup>a†</sup>, C. Bonchi<sup>a</sup>, A. Ugolini<sup>a</sup>, E. Frangipani<sup>a</sup>, G. Polzonetti<sup>a</sup>, P. Visca<sup>a</sup>, C. Meneghini<sup>a</sup>, C

Received 00th January 20xx,  
Accepted 00th January 20xx

DOI: 10.1039/x0xx00000x

[www.rsc.org/](http://www.rsc.org/)

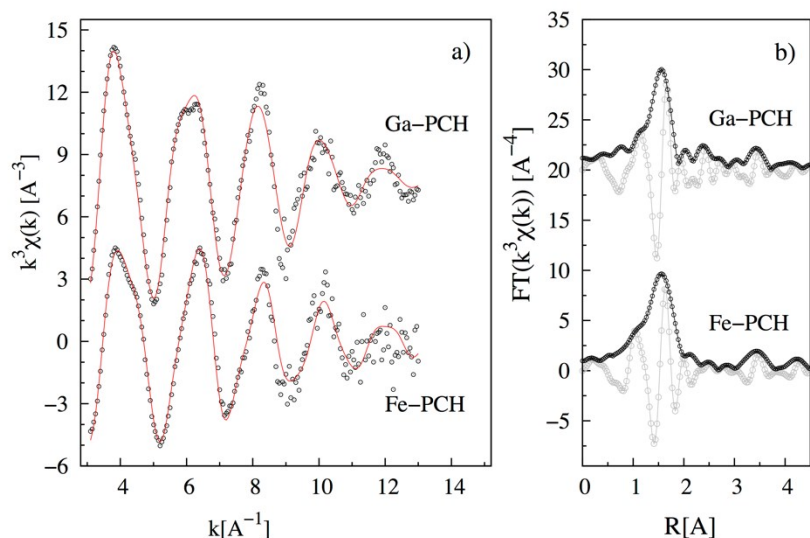

Figure 1 ESI

Panel (a): Comparison of  $k^3$ -weighted experimental EXAFS data (black symbols) and best fit curves (full red line) obtained from multi-shell data refinement procedure for Ge-PCH and Fe-PCH data (shifted for clarity).

Panel (b): the  $k^3$ -weighted Fourier transform moduli and imaginary parts of experimental (symbols) and best fit curves (full lines) are presented for Ga-PCH and Fe-PCH (vertically shifted for clarity) uncorrected for the phase shift (providing an apparent compression of about 0.5 Å).

<sup>a</sup> Roma Tre University, Dept. of Sciences, Via della Vasca Navale 79, 00146 - Rome (Italy).

<sup>†</sup> Corresponding author email: francesco.porcaro@uniroma3.it.
